# Supplementary material
Source: publisher figshare collection journal article supplement (https://acs.figshare.com/ndownloader/files/4766845)
Supplement: Supplementary file 1 [file 4766845]

## Preparation of Monodisperse Au/TiO<sub>2</sub> Nanocatalysts via Self-Assembly

Jing Li and Hua Chun Zeng\*

Department of Chemical and Biomolecular Engineering, Faculty of Engineering  
National University of Singapore, 10 Kent Ridge Crescent, Singapore 119260

\*Email: [chezhc@nus.edu.sg](mailto:chezhc@nus.edu.sg)

The following are two representative EDX spectra and related elemental analyses for the freshly prepared Au/TiO<sub>2</sub> catalysts:

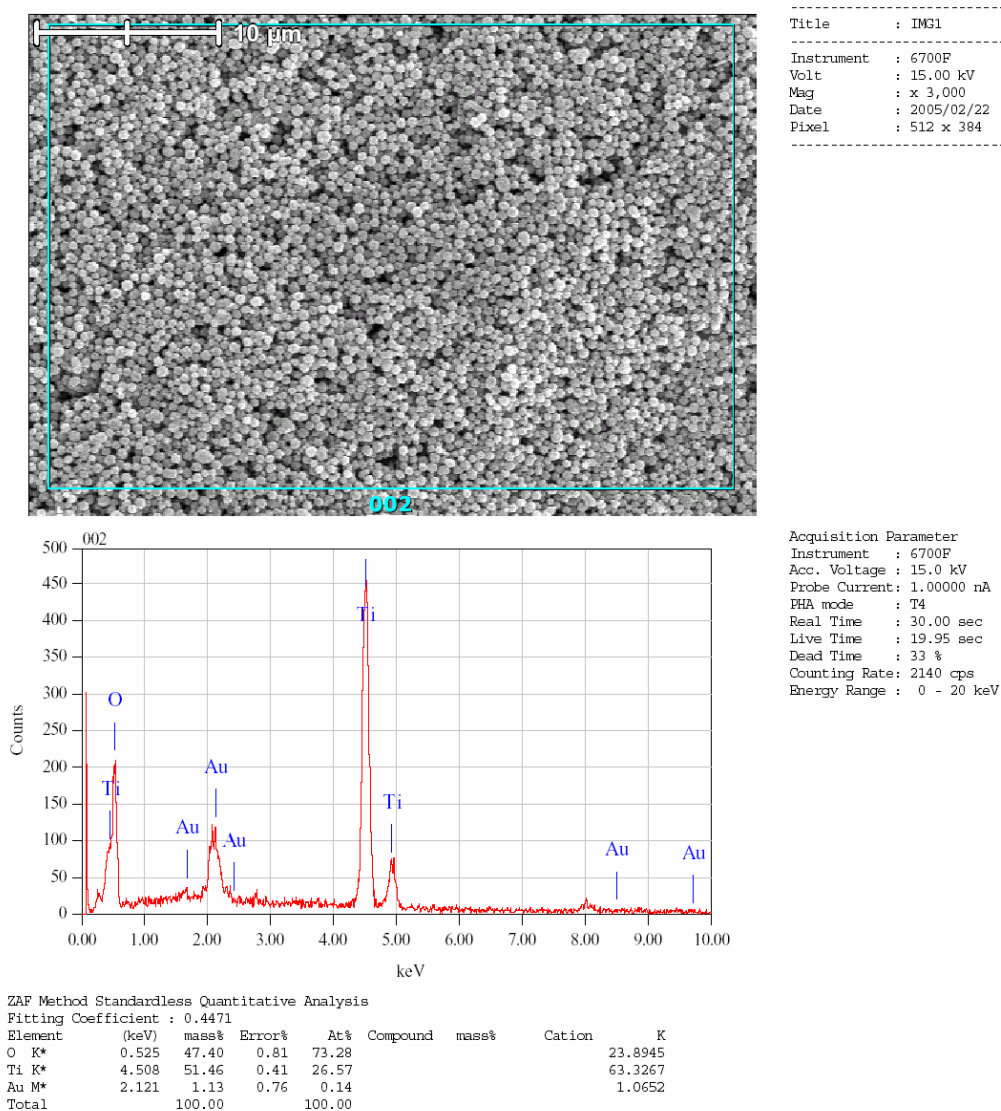

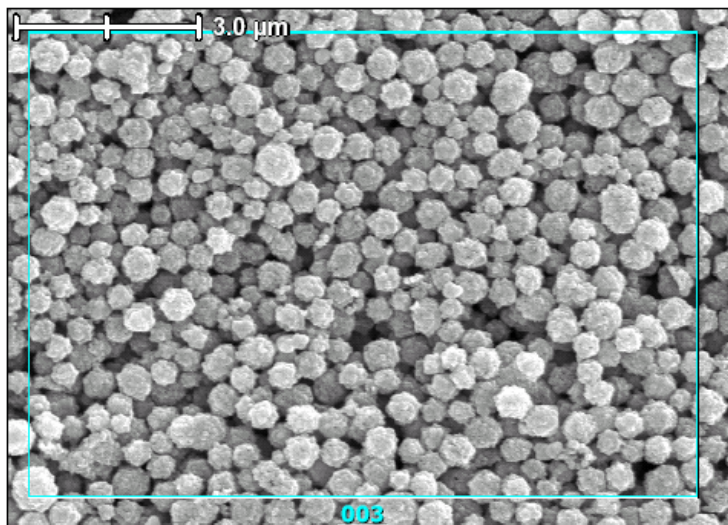

Title : IMG1  
 Instrument : 6700F  
 Volt : 15.00 kV  
 Mag : x 10,000  
 Date : 2005/02/22  
 Pixel : 512 x 384

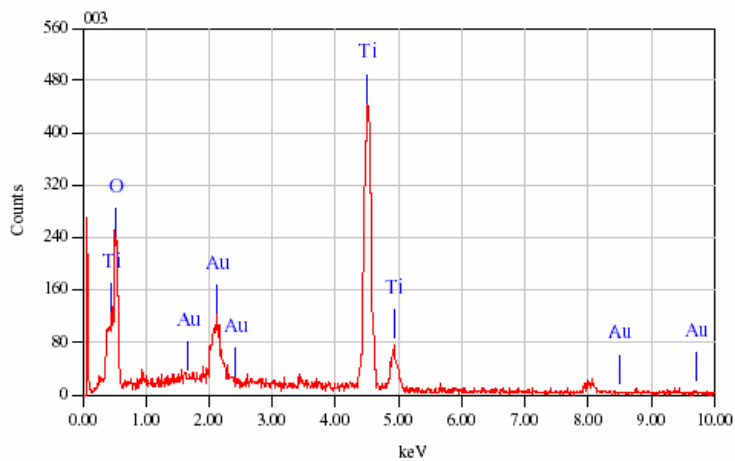

Acquisition Parameter  
 Instrument : 6700F  
 Acc. Voltage : 15.0 kV  
 Probe Current : 1.00000 nA  
 HHA mode : T4  
 Real Time : 30.00 sec  
 Live Time : 20.06 sec  
 Dead Time : 34 %  
 Counting Rate : 2009 cps  
 Energy Range : 0 - 20 keV

ZAF Method Standardless Quantitative Analysis

Fitting Coefficient : 0.4569

| Element | (keV) | mass%  | Error% | At%    | Compound | mass% | Cation | K       |
|---------|-------|--------|--------|--------|----------|-------|--------|---------|
| O K*    | 0.525 | 50.56  | 0.65   | 76.35  |          |       |        | 27.6233 |
| Ti K*   | 4.508 | 46.06  | 0.37   | 23.23  |          |       |        | 55.7177 |
| Au M*   | 2.121 | 3.39   | 0.67   | 0.42   |          |       |        | 3.1556  |
| Total   |       | 100.00 |        | 100.00 |          |       |        |         |
